1 **Novel visualization of the spatiotemporal relationship between ictal spiking and LFP**  
2 **supports the involvement of mid-range excitatory circuits during human focal seizures**

3  
4 Somin Lee<sup>a,b</sup>, Sarita S. Deshpande<sup>a,b</sup>, Edward M. Merricks<sup>c</sup>, Emily Schlafly<sup>d</sup>, Robert Goodman<sup>e</sup>, Guy M.  
5 McKhann<sup>f</sup>, Emad N. Eskandar<sup>g,h</sup>, Joseph R. Madsen<sup>g,i</sup>, Sydney S. Cash<sup>j</sup>, Michel J.A.M. van Putten<sup>k</sup>,  
6 Catherine A. Schevon<sup>c</sup>, Wim van Drongelen<sup>a</sup>

7  
8 <sup>a</sup>Department of Pediatrics, University of Chicago, Chicago, IL 60637

9 <sup>b</sup>Medical Scientist Training Program, University of Chicago, Chicago, IL 60637

10 <sup>c</sup>Department of Neurology, Columbia University, New York, NY 10032

11 <sup>d</sup>Graduate Program in Neuroscience, Boston University, Boston, MA 02215

12 <sup>e</sup>Department of Neurosurgery, Lenox Hill Hospital, New York, NY 10075

13 <sup>f</sup>Department of Neurological Surgery, Columbia University, New York, NY 10032

14 <sup>g</sup>Department of Neurosurgery, Massachusetts General Hospital and Harvard Medical School, Boston, MA  
15 02114

16 <sup>h</sup>Nayef Al-Rodhan Laboratories for Cellular Neurosurgery and Neurosurgical Technology, Massachusetts  
17 General Hospital and Harvard Medical School, Boston, MA 02114

18 <sup>i</sup>Department of Neurosurgery, Brigham and Women's Hospital and Harvard Medical School, Boston, MA  
19 02115

20 <sup>j</sup>Department of Neurology, Massachusetts General Hospital and Harvard Medical School, Boston, MA  
21 02114

22 <sup>k</sup>Clinical Neurophysiology Group, MIRA Institute for Biomedical Engineering and Technical Medicine,  
23 University of Twente, Enschede 7500AE, The Netherlands

24  
25 Designed research: S.L., S.S.D., M.J.A.M.v.P., C.A.S., E.M.M., W.v.D.

26 Performed research: S.L., S.S.D., E.M.M., E.S., E.N.E., J.R.M., S.S.C., R.M., G.M.M., M.J.A.M.v.P.,  
27 W.v.D. Analyzed data: S.L., S.S.D., W.v.D.

28 Wrote and edited manuscript: S.L., S.S.D., E.M.E., J.R.M., S.S.C., M.J.A.M.v.P., C.A.S., W.v.D

29  
30 S.L and S.S.D. contributed equally to this work.

31 The authors declare no competing interests.

32  
33 Corresponding Author: Wim van Drongelen ([wvandron@peds.bsd.uchicago.edu](mailto:wvandron@peds.bsd.uchicago.edu))

34  
35 Keywords: Focal seizure activity, Mid-range connectivity, Spatiotemporal spike-centered average, Ictal  
36 local field potential, Spike-triggered average

37 **Abstract**

38           The relationship between action potentials and the associated local field potential (LFP) in neural  
39 recordings is typically studied only in the temporal domain using the spike-triggered average (STA). In  
40 this study, we present a novel approach, termed the spatiotemporal spike-centered average (st-SCA),  
41 that allows for visualization of the spike-LFP relationship in both the temporal and spatial domains. In this  
42 method, a 3D spatiotemporal topography of spike-associated LFP is calculated from a 2D spatial average  
43 of the LFP centered around the time and location of individual spikes. We applied this method to 25  
44 microelectrode array (MEA) recordings obtained from seven patients with pharmacoresistant focal  
45 epilepsy during ictal and interictal states. Five patients in this dataset had MEA implants in recruited  
46 cortex, and two had implants in unrecruited cortex. Of the five patients with arrays implanted in recruited  
47 territory, three showed STAs that resembled sine cardinal (sinc) functions, and two showed non-sinc  
48 functions. Using the st-SCA, we found that the patients who showed a sinc-function pattern in the  
49 temporal domain showed a donut-shaped ring of LFP activity in the spatial domain. This observation was  
50 corroborated by a theoretical model describing an ictal spike as measured by a macroelectrode. The  
51 model also revealed a special symmetry wherein temporal component of the st-SCA predicts the spatial  
52 component when they both approximate sinc-functions. Supporting this theoretical derivation, a radial cut  
53 of the donut-shaped st-SCA showed a spatial pattern consistent with a sinc-function. This spatial sinc-  
54 function had peaks separated by  $\sim 2.5$ mm—a measurement that supports the role of mid-range excitatory  
55 connections during ictal activity. In sum these findings suggest that patients whose seizures engage mid-  
56 range connections may be identifiable by the spatiotemporal features of ictal spike-associated LFP  
57 activity.

## 58 Introduction

59           Spatiotemporal patterns of brain electrical activity reflect neural mechanisms underpinning  
60 different brain pathologies. Consequently, temporal and spatial patterns observed in electrographic  
61 recordings are frequently employed to guide diagnostic and therapeutic approaches in the treatment of  
62 epilepsy. During surgical evaluation of patients with epilepsy, a variety of electrodes are used to record  
63 brain electrical activity across different scales. For example, large-scale global activity can be recorded by  
64 macroelectrodes at the scalp or cortex, and meso- and microscale activity can be recorded by intracranial  
65 arrays or bundles of microelectrodes (Eissa et al., 2017; Eissa et al., 2016; Schevon et al., 2012). Despite  
66 the heavy reliance on electrophysiology in clinical practice, the relationship between neural activity across  
67 scales and the mechanistic implications of the observed spatiotemporal patterns remain poorly  
68 characterized.

69           One important question in understanding cortical seizure dynamics is how the activity of individual  
70 neurons relates to local and global network activity in ictal and interictal states. The interactions of neural  
71 networks during human focal seizures across micro-, meso- and macroscopic scales have been  
72 characterized by other recent studies (Eissa et al., 2017). Specifically, one study showed that the spike-  
73 triggered average (STA) of the ongoing low frequency component of the local field potential (LFP) could  
74 be approximated by a sine cardinal (sinc) function (Eissa et al., 2018). Furthermore, filtering a train of ictal  
75 action potentials with a rectangular (brick wall) filter generated an output that correlated well with the  
76 observed seizure, consistent with the fact that the Fourier transform of a rectangular function is the sinc-  
77 function (Van Drongelen, 2018). While the ictal STA was determined in the temporal and frequency  
78 domains, the spatial component of the relationship between action potentials and low frequency LFP was  
79 not characterized.

80           Similarly, most previous studies that describe the relationship between single spiking activity and  
81 the surrounding LFP have focused primarily on temporal descriptions using the STA (Bazelot et al., 2010;  
82 Glickfeld et al., 2009). The few studies that have investigated the spatial component of this relationship do  
83 so by incorporating spatial information into the STA through the addition of spatial filters (Telenczuk et al.,  
84 2017) or use a covariance-based approach (Rust et al., 2004). None so far have directly visualized the  
85 full spatial topography of LFP associated with spiking activity.

86           In this study, we present a novel approach, termed the spatiotemporal spike-centered average  
87 (st-SCA), in which a mesoscale spatial topography of spike-associated LFP can be visualized by  
88 calculating a spatial average of the LFP centered around the location of individual spikes. Calculation of  
89 this topography results in a powerful tool that allows for the visualization of both the spatial and temporal  
90 components of the spike-LFP relationship. We apply this method to microelectrode array (MEA)  
91 recordings of human focal seizures to reveal unique spatiotemporal patterns that support the role of mid-  
92 range excitatory connections during ictal activity. We then combine these MEA observations with a  
93 mathematical model describing an ictal spike as measured by a macroelectrode to show that in special  
94 cases, the temporal and spatial features of the spike-associated LFP can predict one another. In the

95 discussion, we explore the biological mechanisms and clinical implications of the newly observed  
96 spatiotemporal properties in the context of pharmaco-resistant focal epilepsy.

## 97 Results

98 To expand upon the traditional temporal characterization of the complex relationship between  
99 neuronal firing and the overlying global LFP (Movie S1), we introduce a novel calculation termed the  
100 spatiotemporal spike-centered average (st-SCA). The st-SCA builds upon the more typically utilized STA  
101 by accounting for both spike timing and location. The st-SCA is determined with respect to the action  
102 potential's timing ( $t$ , temporal component) and location in the cortical plane ( $x, y$ ; spatial component). To  
103 do this, we characterize the multi-unit action potential train (with  $i = 1, \dots, N$  action potentials occurring at  
104  $x_i, y_i, t_i$ ) as a series of unit impulses:

$$105 \sum_{i=1}^N \delta(x - x_i, y - y_i, t - t_i). \quad (1)$$

106 This produces the expression for the normalized spatiotemporal cross-correlation  $C(\xi, \psi, \tau)$  between the  
107 LFP and action potential:

$$108 C(\xi, \psi, \tau) = \frac{1}{N} \iiint (\sum_{i=1}^N \delta(x - x_i, y - y_i, t - t_i)) LFP(x + \xi, y + \psi, t + \tau) dx dy dt \quad (2)$$

109 To evaluate this expression, we interchange the integration and summation operations and integrate over  
110 the spatiotemporal domain. The resulting expression is defined as the st-SCA:

$$111 C(\xi, \psi, \tau) = \frac{1}{N} \sum_{i=1}^N LFP(x_i + \xi, y_i + \psi, t_i + \tau) = st-SCA(\xi, \psi, \tau) \quad (3)$$

112 Note that if we set the range of  $(\xi, \psi)$  equal to the area covered by a fixed spatial range, we obtain the  
113 well-known temporal STA (Fig. 1A). In contrast, if we set  $\tau$  to a fixed temporal range, we obtain purely the  
114 spatial component of the st-SCA for that epoch. In the following, we describe the computational steps to  
115 determine the st-SCA in MEA recordings.

### 123 Calculation of the st-SCA in MEA recordings

124 To apply the st-SCA to MEA recordings, we must account for the irregular timing and location of  
125 spiking activity across the array. A simplified analogy of this approach is to visualize spiking activity as  
126 stones being tossed into water. Consider throwing a single stone into water and analyzing the consequent  
127 effects by observing the resulting water ripples. We can simulate multiple sources by dropping identical  
128 stones from the same height but at different times and locations across the horizontal plane of the water  
129 surface, resulting in a complex landscape. To determine the contribution of a single stone to this  
130 landscape, we can take a field of view centered around individual stones. According to Eq. 3, averaging  
131 across all stones gives us the spatial pattern of activity associated with each stone. If we also include the  
132 time interval around each dropped stone, we obtain the stone's characteristic spatiotemporal perturbation.

133 To apply this to the analysis of MEA recordings, spikes are detected for each channel in the MEA  
134 (Fig. 1B, left column), and the low frequency LFP associated with each spike is determined (Fig. 1B,  
135 middle column). This LFP is then spatially translated such that the associated spike position  $(x, y)$  is at  
136 the origin of a new axes  $(\xi, \psi)$  (Fig 1B, right column). This spike detection and LFP translation process is  
137 then applied to all channels. Averaging the results across all channels results in a field of view of the  
138 spike-associated LFP that is (1) centered around individual spikes and (2) approximately four times larger  
139 than the area of the MEA (Fig. 1B, right panel). This field is then calculated for time points  $\tau$  to result in  
140 the st-SCA.

141

### 142 **Application of st-SCA to clinical recordings allows visualization of spatiotemporal dynamics of** 143 **human focal seizures**

144 We applied the st-SCA method to analyze microelectrode recordings of focal seizures in patients  
145 undergoing epilepsy surgery evaluation. These recordings were obtained from 96-channel, 4x4mm MEA  
146 during and around ictal activity (Schevon et al., 2012; Truccolo et al., 2011). Filtering was used to extract  
147 local multi-unit neural firing activity and the associated low frequency component of the LFP of the  
148 surrounding network (Methods). A total of 19 seizures from seven patients was used for the study (Table  
149 S1). Both ictal and interictal recordings were evaluated, where interictal was defined as being at least two  
150 hours away from any known ictal activity. Of the seven patients analyzed for this study, five patients had  
151 arrays implanted in the recruited seizure territory (Patients 1-5), and two patients had arrays implanted in  
152 unrecruited seizure territory but within the clinically-determined seizure onset zone (Patients 6-7)  
153 (Schevon et al., 2012). As previously described, recruited seizure territory is defined as local tissue  
154 invasion by the seizure wavefront. Unrecruited territory is located outside of the recruited territory but can  
155 show rhythmic EEG activity due to local synaptic activity (Merricks et al., 2021; Schevon et al., 2012).

156 The representative STAs calculated across ictal and interictal states for two recruited territory  
157 recordings and one unrecruited territory recording are depicted in Fig. 2. The black lines represent the  
158 STAs, the red lines represent the associated noise estimates, and the vertical dotted lines indicate  $t = 0$ ,  
159 i.e., the timing of the spike trigger. For both recruited and unrecruited territory recordings, the amplitudes  
160 of the ictal STAs (Fig. 2C, E, G) were larger than the corresponding the interictal STAs (Fig. 2D, F, H).  
161 The amplitude for the unrecruited ictal STA (Fig. 2G), however, was much smaller than the recruited ictal  
162 STAs (Fig. 2C, E).

163 Patients with the MEA located in recruited seizure territory showed STAs with different  
164 morphologies (Fig. S2A-E), but all had a dominant negative peak around  $t = 0$ . Consistent with previous  
165 findings, we found that the STA for Patients 1-3 resembled a sinc-function with a peak embedded in a  
166 weak oscillatory component (Fig. 2C, 3A, S2A-C) (Eissa et al., 2018). In contrast, the STA for Patients 4  
167 and 5 did not resemble a sinc-function as Patient 4 showed a dominant peak embedded in a strong  
168 oscillation (Fig. S4D) while Patient 5 showed no oscillatory component (Fig. 2E, Fig. 3B, S4E). The STAs

169 for Patients 6 and 7 with the MEA in unrecruited territory were weak with a smaller amplitude deflection  
170 around to  $t = 0$  (Fig. 2G, Fig. S4F, G).

171 We then evaluated the relationship between spiking activity and the LFP in the spatiotemporal  
172 domain by computing the st-SCA over the entire MEA ( $\xi, \psi$ ) and times  $\tau = \pm 1\text{ms}$  (Fig. 3C, D). This 2ms  
173 interval averaged across to yield a 2D spatial topography. In the ictal phase for Patients 1-3, we observed  
174 a centrally located trough surrounded by a pair of rings with apparent radial symmetry (Fig. 3C, Fig. S2A).  
175 The distance between the center and the region indicated by the inner circle was  $\sim 1.5\text{mm}$ , and the  
176 distance between center and the region indicated by the outer circle was  $\sim 2.5\text{mm}$  (Fig. 3C). In contrast,  
177 the ictal phase for Patients 4 and 5 showed a deep well of stronger negative activity (e.g., Fig. 3D). The  
178 st-SCAs during the interictal phase as well as the results obtained in unrecruited territories showed  
179 different patterns with relatively smaller amplitude signals (Fig. S2B, D, E, F). For a list of representative  
180 temporal and spatial STAs for each patient, see Fig. S2.

181 In sum, three of five patients with recordings from recruited territories (Patients 1-3) showed st-  
182 SCAs resembling sinc-functions in the temporal domain and st-SCAs resembling donut-shaped rings of  
183 activity in the spatial domain. In Patients 4 and 5, the STAs were characterized by a non-sinc  
184 morphology, and the st-SCAs showed deep and diffuse wells of negative activity (Fig. 3D, S4D, E).

185 Note that these observations were not attributable to widespread correlations among MEA  
186 electrodes. To demonstrate that the observed st-SCA patterns are representative of the spike-LFP  
187 relationship and not the global, macroscale correlations amongst network LFPs, we showed that STAs in  
188 unrecruited territory show a large and significant oscillatory component only when triggered by spikes  
189 from recruited territories (Fig. S4B), and not when triggered by spikes from unrecruited territories (Fig.  
190 S4C). This result is a replication of previous studies (Eissa et al., 2017). Furthermore, randomizing the  
191 spike times detected across the MEA resulted in complete destruction of the observed st-SCA patterns,  
192 emphasizing the importance of spike timing as the driver for these spatiotemporal patterns (Fig. S5).  
193 Finally, calculation of the st-SCA after applying a spatial filter to decorrelate LFP signals across MEA  
194 channels did not qualitatively alter the st-SCA patterns (Methods, Fig. S6).

195

## 196 **Theoretical model reveals a unique symmetry that allows for prediction of temporal and spatial** 197 **components of the st-SCA**

198 The st-SCA calculations presented above were obtained indirectly by an averaging procedure in  
199 order to reduce the noise not associated with the spike trigger in the spike-LFP relationship. In this  
200 section, we simulate an ideal noise-free, controlled environment where spatial and temporal relationships  
201 can be measured directly (Fig. 4).

202 Here, the sum of all measurements across the MEA can be represented by a single  
203 macroelectrode, which records cortical activity when a spike occurs at time zero and at the center of the  
204 electrode. This is a measurement of the noise-free spatiotemporal local field function  $f(r, \tau)$  (space ( $r$ )  
205 and time ( $\tau$ )) associated with the central spike represented by a delta function,  $\delta(r, \tau)$ . Because the

206 potential of cortical generators attenuates sharply with distance, we consider contributions from activity in  
207 areas not directly under the macroscopic electrode to be negligible. Under this assumption, the  
208 electrode's signal can be approximated by summing the contributions over the neocortical area under the  
209 electrode, and we find the following expression for  $STA(\tau)$ :

$$210$$
$$211 \quad STA(\tau) \approx \int_{-R}^R f(r, \tau) dr = \int_{-\infty}^{\infty} rect(-R, R) f(r, \tau) dr \quad (4)$$
$$212$$

213 with  $rect(-R, R)$  representing a rectangular window bounded by  $[-R, R]$ . Similarly, if we compute the  
214 spatial component of the SCA,  $st-SCA_s(r)$ , by integration over a fixed time epoch,  $[-T, T]$ , around the  
215 seizure onset, we get:

$$216$$
$$217 \quad st-SCA_s(r) = \int_{-T}^T f(r, \tau) d\tau = \int_{-\infty}^{\infty} rect(-T, T) f(r, \tau) d\tau \quad (5)$$
$$218$$

219 Because the action potential can be represented by a unit impulse,  $STA(\tau)$  and  $st-SCA_s(r)$  are equivalent  
220 to a cortical unit impulse response (UIR). The UIR can be used to link the spike train to the associated  
221 LFP (Supplementary Information). In most cases the function  $f(r, \tau)$  cannot be simply derived from  
222 measuring the  $STA(\tau)$  and  $st-SCA_s(r)$ , but one could apply an *ad hoc* solution so that Eq. 4 and 5 produce  
223 the correct characterization:

$$224$$
$$225 \quad f(r, \tau) \propto st-SCA_s(r) STA(\tau). \quad (6)$$
$$226$$

227 In special cases, however,  $f(r, \tau)$  may be mathematically derived. Note that we determined earlier that in  
228 three of five patients with recordings in the recruited territory, the  $STA(\tau)$  resembles a sinc-function:

$$229$$
$$230 \quad STA(\tau) \propto sinc(\tau). \quad (7)$$
$$231$$

232 This represents a unique scenario in which the  $f(r, \tau)$  and  $st-SCA_s(r)$  may be predicted from the  
233 characterization of  $STA(\tau)$  alone. The sinc-function is the UIR of an ideal filter, and a previous study has  
234 used this property to show that an ictal spike train passed through an ideal filter recreates the seizure's  
235 LFP (Eissa et al., 2018). Since the sinc-function is defined as the Fourier transform of a rectangular  
236 function, the relationship between time and space conveniently parallels a time-frequency Fourier-  
237 transform-pair. Accordingly, we find:

$$238$$
$$239 \quad f(r, \tau) \propto e^{jr\tau} \quad (8)$$
$$240$$



241 Substitution of this finding into Eq. 5 enables us to find the  $st\text{-}SCA_s(r)$ , which represents the spatial  
242 postsynaptic effects of an action potential effective over a fixed time epoch around the seizure onset  
243  $([-T, T])$ :

$$244 \quad st\text{-}SCA_s(r) \propto \int_{-\infty}^{\infty} rect(-T, T) e^{jr\tau} d\tau = sinc(r) \quad (9)$$

245  
246 Thus, we find that in the special case where both  $STA(\tau)$  and  $st\text{-}SCA_s(r)$  are described by sinc-functions,  
247 the temporal features of the spike-associated LFP can predict the spatial features, and vice versa.

### 248 249 **Quantification of the peak-to-peak distance of spatial patterns supports the involvement of mid-** 250 **range excitatory connections**

251 Since the model showed that a sinc-function in the temporal domain predicts a sinc-function in  
252 the spatial domain, we aimed to more quantitatively describe the donut-shaped activity observed in Fig.  
253 3C. Taking advantage of the radial symmetry observed in the st-SCA, we converted the Cartesian  
254 coordinates  $(\xi, \psi)$  into polar coordinates  $(r, \theta)$  and focused on the spatial relationship with respect to  $r$   
255 (Fig. 5A). This enabled us to depict the st-SCA in two dimensions,  $(r, \tau)$  (Fig. 5B). A detail of that  
256 relationship is depicted in Fig. 5C, and the summed values across this two-dimensional detail are plotted  
257 along its margins. These summed values are the two components as a function of space and time ( $r$  and  
258  $\tau$ ). Note that the bottom graph in Fig. 5C represents the central trough ( $\tau = \pm 35\text{ms}$ ) of the function  
259 shown in Fig. 3A. As anticipated by the outcome in Eq. 9 we observed a spatial component (Fig. 5C) that  
260 shows a central trough with smaller amplitude side lobes---a pattern consistent with the shape of a sinc-  
261 function. Note that the resolution and range of the spatial component ( $r = \pm 3.6\text{mm}$ ) is limited by the size  
262 of the MEA (Methods, Fig. 1B). Consistent with the donut-shaped rings observed in Fig. 3C, the peaks of  
263 the function shown in the side panel of Fig. 5C were separated by  $\sim 2.5\text{mm}$  (blue arrows, Fig. 5C).

264 **Discussion**

265 The neural dynamics of human focal seizures show a complex relationship between action  
266 potential activity and the LFP (Movie S1). Because characterizing this relationship is important for  
267 understanding seizure generation and propagation, this study aimed to determine the spatiotemporal  
268 patterns observed across seizure states and cortical locations. Analyses of clinical recordings (Fig. 2, 3,  
269 5) showed that the spike-LFP relationship for some focal seizures can be approximated by a sinc-function  
270 in both the spatial and temporal domains. Our theoretical model (Eq. 4-9; Fig. 4) further showed that a  
271 sinc-function in the temporal domain can predict a sinc-function in the spatial domain. Here, we discuss  
272 the potential biological implications of our findings.

273 Under physiological conditions, synaptic activity is a major contributor to the extracellular potential  
274 field (Nunez et al., 2006). Other contributors may include intrinsic membrane currents, gap junctions,  
275 neuron-glia interactions, and ephaptic effects (Buzsaki et al., 2012; Herreras, 2016). While the relative  
276 contributions of these different mechanisms during pathological states such as seizures have not been  
277 fully elucidated, a non-zero cross-correlation between action potentials and LFPs is expected because  
278 synaptic currents are a major component in the compound activities observed in ictal states.

279 In our discussion of the mechanistic implications of the observed st-SCAs, we assign a net  
280 excitation to negative deflections and net inhibition to positive deflections, as previously described (Eissa  
281 et al., 2017). Accordingly, our st-SCA analyses (Fig. 2, 3) show that in the recruited ictal territory, the  
282 spike-LFP correlation at small lags are dominated by net excitation during seizures in all patients. The  
283 activity level in the excitatory center, representing the activity at the ictal wave, is excessively high,  
284 possibly due to saturation of the local inhibitory population (Tryba et al., 2019). In Patients 1-3 we also  
285 observe a ring of reduced excitation at a distance  $\sim 1.5$ mm around the excitatory center (Fig. 3C, Fig.  
286 S2A). In turn, the ring of reduced excitation is surrounded by a second ring at an additional distance of  
287  $\sim 1$ mm where excitation increases again. For these patients, this donut-shaped st-SCA is specific to the  
288 recruited seizure territory in the ictal phase (Fig. S2). This observation suggests that the ictal wave in the  
289 recruited territory, represented by the excitatory center  $(\xi, \psi = 0, 0)$ , creates an escape of hyperexcitation  
290 via a jump that engages mid-range connectivity in the millimeter range (Fig. 3, 5). Decorrelation of the  
291 LFP prior to the st-SCA calculations yielded similar spatiotemporal patterns (Fig. S5), further  
292 corroborating the importance of local mm-range excitatory connections in focal seizures.

293 A question that remains is the biological basis for this connectivity. Histological studies have  
294 shown that there are indeed excitatory mid-range connections at the millimeter scale mediated by axon  
295 collaterals within the gray matter in the neocortex in addition to short-range excitatory and inhibitory  
296 connections at a scale of hundreds of  $\mu\text{m}$  (Fig. 6A) (Nieuwenhuys, 1994; Oberlaender et al., 2011; Pichon  
297 et al., 2012; Zhang & Deschênes, 1997). Additionally, previous studies of ictal wave dynamics provide  
298 direct evidence that mm-range connections are invoked during seizure activity (Schevon et al., 2012). An  
299 example of this jump in action potential activity is depicted in the spatial plot in Fig. 6A (a snapshot of  
300 Movie S1), in which there are multiple areas of simultaneously increased neural activity across the MEA,

301 separated by mm-range gaps. This is consistent with the distance between the excitatory center and  
302 outer ring we observe in the donut-shaped spatial cross-correlation depicted in Fig. 3C. This pathological  
303 escape of uncontrolled excitation across cortex could be considered a candidate mechanism in seizure  
304 recruitment and propagation (see SI: Mechanisms for Focal Seizures).

305 Not all patients with implants in recruited territory showed spatiotemporal patterns resembling a  
306 sinc-function, and the clinical etiologies for these patients may offer some clues about why this is the  
307 case. The diffuse depressions observed in the spatial domains for both Patients 4 and 5 (Fig. 3D, S2C,  
308 S2D, E) are consistent with a local flood of excitation. Indeed, the seizures in both of these patients were  
309 characterized as secondarily generalized. This suggests that in generalized seizures, the mid-range  
310 excitatory connectivity structure (as represented by the sinc-function) may play a diminished role in  
311 comparison to other mechanisms of ictal propagation, such as local excitation or engagement of white  
312 matter tracts (Fig. 6A). Furthermore, a unique case is Patient 3, who was diagnosed with cortical  
313 dysplasia. The STA is sinc-like, and the st-SCA partially resembles a sinc-function (Fig. S2C). Cortical  
314 dysplasias have been shown to be associated with functional connectivity defects (Hong et al., 2017;  
315 Jeong et al., 2014; Rezayev et al., 2018) which may explain the partial donut ring of activity in the st-STA  
316 (Fig. S2C).

317 From these results, we propose that focal seizures that engage mid-range excitatory circuits may  
318 be identified by their spike-LFP spatiotemporal patterns. With this information, clinicians can potentially  
319 target specific mechanisms underlying a patient's seizures and choose appropriate therapeutic strategies.  
320 For example, removal of horizontal interactions on a mm-scale has been the rationale for performing  
321 subpial transections in patients with intractable epilepsy (Morrel et al., 1989). In these cases,  
322 characterization of the st-SCA may inform the appropriateness of such interventions in personalized  
323 patient treatment plans.

324 In addition, our results suggest that these spatiotemporal patterns may be obtained without the  
325 use of MEAs. While MEAs are advantageous for monitoring and studying seizure activity with high  
326 temporal and spatial resolution, their current clinical utility is limited as they cannot be easily used to  
327 sample from multiple cortical areas. Our theoretical model, however, showed that a sinc-function in the  
328 temporal domain can predict the presence of a donut-shaped ring of activity in the spatial domain.  
329 Consequently, a clinician could hypothesize that mid-range excitatory connections may be involved  
330 during a patient's focal seizure if a sinc-function is observed in the temporal domain. Interestingly, we  
331 found that the sinc-function can be characterized in the temporal domain by using spiking and LFP  
332 information from a random subset of only eight electrodes (Fig. S7). This suggests that the st-SCA may  
333 be characterized by using neocortical microelectrodes that allow for recording from multiple areas by  
334 reducing the number of channels per probe. The development of such electrodes is technologically  
335 feasible as similar probes already used clinically for the monitoring of deep brain structures (Misra et al.,  
336 2014).

337

## 338 **Materials and Methods**

### 339 *Patients*

340 Seven patients with pharmacoresistant focal epilepsy underwent chronic intracranial EEG studies  
341 to help identify the epileptogenic zone for subsequent removal. Patients 1, 4, 6, and 7 were recruited at  
342 Columbia University Medical Center, and Patients 2, 3, and 5 were recruited from Massachusetts General  
343 Hospital/Brigham and Women's Hospitals (Table S1). Procedures were approved by the Internal Review  
344 Board committees at Columbia University Medical Center, The University of Chicago Comer Children's  
345 Hospital, and Massachusetts General Hospital/Brigham and Women's Hospitals. The patients' surgeries  
346 and treatment plans were not directed by or altered as a result of these studies.

347

### 348 *Signal acquisition and pre-processing*

349 A 96-channel, 4 x 4mm MEA (Utah array; Blackrock Microsystems) was implanted along with  
350 subdural electrodes (ECoG) with the goal of recording from seizure onset sites. Additional details of study  
351 enrollment and surgical procedures have been previously published (Schevon et al., 2012; Truccolo et al.,  
352 2014). Signals from the MEA were acquired continuously at a sample rate of 30 kHz per channel (0.3-  
353 7500Hz bandpass, 16-bit precision, range  $\pm 8$  mV). The reference was epidural. Up to three seizures from  
354 each patient were selected for detailed analysis to avoid biasing the dataset from the patients from whom  
355 many seizures were recorded. Seizure recordings were categorized as recruited or unrecruited territory  
356 using previously described methods (Schevon et al., 2012). Channels and time periods with excessive  
357 artifact or low signal-to-noise ratio were excluded.

358 Unit activity was identified using filtered 0.3-3kHz signals with spikes defined as deflections  $\geq 4$   
359 standard deviations below the mean. The low frequency component of the local field potential (LFP)  
360 activity across the array was created by averaging the artifact-free LFP activity from all micro-electrode  
361 signals filtered 2-50Hz. The averaged LFP procedure has been shown to generate signals that are  
362 representative of and comparable to nearby electrocorticography signals (Eissa et al., 2017; Eissa et al.,  
363 2018).

364

### 365 *Spatiotemporal spike-centered average (st-SCA) calculations and signal analysis*

366 All signal processing and statistical analyses were performed in MATLAB (MATLAB, Natick, MA,  
367 USA). The st-SCA was determined as follows. First, as described in (Eissa et al., 2017; Eissa et al.,  
368 2018), we detected the spikes in the multi-unit activity. Next, we collected the spatiotemporal data around  
369 each spike and translated the time and position of all associated LFPs relative to each spike's time and  
370 position (Fig. 1). Finally, we summed all translated data and computed the average at each time and  
371 position by dividing the sum by its number of contributions. Note that this position-dependent average is  
372 necessary because not every position receives the same number of contributions during the translation of  
373 the LFP's axes.

374 Evidence of radial symmetry of the st-SCA (Fig. 3C) allowed conversion from Cartesian  
375 coordinates  $(\xi, \psi)$  coordinates to polar coordinates  $(r, \theta)$ . By ignoring the minor deviations from radial  
376 symmetry, we focused on the spatial component of the st-SCA with respect to  $r$  (Fig. 5A), which enabled  
377 us to depict the spatiotemporal properties in two dimensions (Fig. 5). Furthermore, if we compute the sum  
378 across space, we obtain purely the temporal component of the st-SCA, which is equivalent to the STA.  
379 Similarly, summation over time  $\tau$  generates the spatial component of the st-SCA. With these results, we  
380 can assess to what extent our model of the ictal network, a linear time-invariant (LTI) system with unit  
381 impulse response  $C(\tau) \propto \text{sinc}(r, \tau)$ , fits the data. A stepwise description of this method can be found in  
382 the Supporting Information.

383 For calculations involving the spatial filtering of LFP signals, we applied the spatial whitening  
384 process as described in Hyvärinen et al. (2001) and Telenczuk et al. (2017). As previously published, a  
385 signal is spatially filtered by matrix multiplication with a whitening matrix  $\mathbf{W}$ , where  $\mathbf{W}$  is the inverse  
386 square root of the signal's covariance matrix,  $\mathbf{C}$ :

387

$$388 \quad \mathbf{W} = \mathbf{C}_{signal}^{-1/2} = \mathbf{E}\mathbf{D}^{-1/2}\mathbf{E}^T \quad (10)$$

389

390 where  $\mathbf{E}$  is a matrix of eigenvectors of  $\mathbf{C}_{signal}$ , and  $\mathbf{D}$  is a diagonal matrix with inverse square roots of  
391 eigenvalues  $\lambda_i$  on its diagonal, such that  $\mathbf{D}_{ii} = \frac{1}{\lambda_i}$  and  $\mathbf{D}_{ij} = 0$  (Telenczuk et al., 2017). In this study, the  
392 signals being transformed were the MEA channel signals bandpass filtered at 2-50Hz.

393 **Acknowledgements**

394 We thank Drs. Mark Kramer, Stephan A. van Gils, Hil Meijer, Douglas R. Nordli Jr., and Jack D.  
395 Cowan for valuable discussion and suggestions. C.A.S., and W.v.D. were supported by NIH Grants R01  
396 NS095368 and R01 NS084142. C.A.S, S.S.C and E.S. were partially supported by NIH Grant R01  
397 R01NS110669. S.L and S.S.D. were supported by University of Chicago MSTP Training Grant  
398 T32GM007281.

399

400 **Data Availability**

401 The data used for this study are available on request from the corresponding author (W.v.D). The  
402 data is not publicly available due to HIPAA protections, and all data sharing will have to follow protocols  
403 compliant with HIPAA policies.

404

405 **Code Availability**

406 All scripts and programs used to generate the results in this data will be made publicly available  
407 in a Github repository ([https://github.com/sominlee14/stSCA\\_scripts](https://github.com/sominlee14/stSCA_scripts)).

408 **References**

- 409 Bazelot, M., Dinocourt, C., Cohen, I., & Miles, R. (2010). Unitary inhibitory field potentials in the CA3  
410 region of rat hippocampus. *J Physiol*, 588(Pt 12), 2077-2090.  
411 <https://doi.org/10.1113/jphysiol.2009.185918>
- 412 Buzsaki, G., Anastassiou, C. A., & Koch, C. (2012). The origin of extracellular fields and currents--EEG,  
413 ECoG, LFP and spikes. *Nat Rev Neurosci*, 13(6), 407-420. <https://doi.org/10.1038/nrn3241>
- 414 Eissa, T. L., Dijkstra, K., Brune, C., Emerson, R. G., van Putten, M., Goodman, R. R., McKhann, G. M.,  
415 Jr., Schevon, C. A., van Drongelen, W., & van Gils, S. A. (2017). Cross-scale effects of neural  
416 interactions during human neocortical seizure activity. *Proc Natl Acad Sci U S A*, 114(40), 10761-  
417 10766. <https://doi.org/10.1073/pnas.1702490114>
- 418 Eissa, T. L., Schevon, C. A., Emerson, R. G., McKhann, G. M., Jr., Goodman, R. R., & Van Drongelen,  
419 W. (2018). The Relationship Between Ictal Multi-Unit Activity and the Electrocorticogram. *Int J*  
420 *Neural Syst*, 28(10), 1850027. <https://doi.org/10.1142/S0129065718500272>
- 421 Eissa, T. L., Tryba, A. K., Marcuccilli, C. J., Ben-Mabrouk, F., Smith, E. H., Lew, S. M., Goodman, R. R.,  
422 McKhann, G. M., Jr., Frim, D. M., Pesce, L. L., Kohrman, M. H., Emerson, R. G., Schevon, C. A.,  
423 & van Drongelen, W. (2016). Multiscale Aspects of Generation of High-Gamma Activity during  
424 Seizures in Human Neocortex. *eNeuro*, 3(2). <https://doi.org/10.1523/ENEURO.0141-15.2016>
- 425 Glickfeld, L. L., Roberts, J. D., Somogyi, P., & Scanziani, M. (2009). Interneurons hyperpolarize pyramidal  
426 cells along their entire somatodendritic axis. *Nat Neurosci*, 12(1), 21-23.  
427 <https://doi.org/10.1038/nn.2230>
- 428 Herreras, O. (2016). Local Field Potentials: Myths and Misunderstandings. *Front Neural Circuits*, 10, 101.  
429 <https://doi.org/10.3389/fncir.2016.00101>
- 430 Hong, S. J., Bernhardt, B. C., Gill, R. S., Bernasconi, N., & Bernasconi, A. (2017). The spectrum of  
431 structural and functional network alterations in malformations of cortical development. *Brain*,  
432 140(8), 2133-2143. <https://doi.org/10.1093/brain/awx145>
- 433 Hyvärinen, A., Karhunen, J., & Oja, E. (2001). *Independent Component Analysis*. Wiley.  
434 <https://books.google.com/books?id=9TQNEAAAQBAJ>
- 435 Jeong, W., Jin, S. H., Kim, M., Kim, J. S., & Chung, C. K. (2014). Abnormal functional brain network in  
436 epilepsy patients with focal cortical dysplasia. *Epilepsy Res*, 108(9), 1618-1626.  
437 <https://doi.org/10.1016/j.eplepsyres.2014.09.006>
- 438 Merricks, E. M., Smith, E. H., Emerson, R. G., Bateman, L. M., McKhann, G. M., Goodman, R. R., Sheth,  
439 S. A., Greger, B., House, P. A., Trevelyan, A. J., & Schevon, C. A. (2021). Neuronal Firing and  
440 Waveform Alterations through Ictal Recruitment in Humans. *J Neurosci*, 41(4), 766-779.  
441 <https://doi.org/10.1523/jneurosci.0417-20.2020>
- 442 Misra, A., Burke, J. F., Ramayya, A. G., Jacobs, J., Sperling, M. R., Moxon, K. A., Kahana, M. J., Evans,  
443 J. J., & Sharan, A. D. (2014). Methods for implantation of micro-wire bundles and optimization of  
444 single/multi-unit recordings from human mesial temporal lobe. *J Neural Eng*, 11(2), 026013.  
445 <https://doi.org/10.1088/1741-2560/11/2/026013>
- 446 Nieuwenhuys, R. (1994). The neocortex. An overview of its evolutionary development, structural  
447 organization and synaptology. *Anat Embryol (Berl)*, 190(4), 307-337.  
448 <https://doi.org/10.1007/bf00187291>



- 449 Nunez, P. L., Nunez, E. P. B. E. P. L., Srinivasan, R., & Press, O. U. (2006). *Electric Fields of the Brain: The Neurophysics of EEG*. Oxford University Press.  
450 <https://books.google.com/books?id=81VRmGlprS8C>  
451
- 452 Oberlaender, M., Boudewijns, Z. S., Kleele, T., Mansvelder, H. D., Sakmann, B., & de Kock, C. P. (2011). Three-dimensional axon morphologies of individual layer 5 neurons indicate cell type-specific intracortical pathways for whisker motion and touch. *Proc Natl Acad Sci U S A*, 108(10), 4188-4193. <https://doi.org/10.1073/pnas.1100647108>  
453  
454  
455
- 456 Pichon, F., Nikonenko, I., Kraftsik, R., & Welker, E. (2012). Intracortical connectivity of layer VI pyramidal neurons in the somatosensory cortex of normal and barreless mice. *Eur J Neurosci*, 35(6), 855-869. <https://doi.org/10.1111/j.1460-9568.2012.08011.x>  
457  
458
- 459 Rezayev, A., Feldman, H. A., Levman, J., & Takahashi, E. (2018). Bilateral thalamocortical abnormalities in focal cortical dysplasia. *Brain Res*, 1694, 38-45. <https://doi.org/10.1016/j.brainres.2018.05.005>  
460
- 461 Rust, N. C., Schwartz, O., Movshon, J. A., & Simoncelli, E. (2004). Spike-triggered characterization of excitatory and suppressive stimulus dimensions in monkey V1. *Neurocomputing*, 58-60, 793-799. <https://doi.org/10.1016/j.neucom.2004.01.128>  
462  
463
- 464 Schevon, C. A., Weiss, S. A., McKhann, G., Jr., Goodman, R. R., Yuste, R., Emerson, R. G., & Trevelyan, A. J. (2012). Evidence of an inhibitory restraint of seizure activity in humans. *Nat Commun*, 3, 1060. <https://doi.org/10.1038/ncomms2056>  
465  
466
- 467 Telenczuk, B., Dehghani, N., Le Van Quyen, M., Cash, S. S., Halgren, E., Hatsopoulos, N. G., & Destexhe, A. (2017). Local field potentials primarily reflect inhibitory neuron activity in human and monkey cortex. *Sci Rep*, 7, 40211. <https://doi.org/10.1038/srep40211>  
468  
469
- 470 Truccolo, W., Ahmed, O. J., Harrison, M. T., Eskandar, E. N., Cosgrove, G. R., Madsen, J. R., Blum, A. S., Potter, N. S., Hochberg, L. R., & Cash, S. S. (2014). Neuronal ensemble synchrony during human focal seizures. *J Neurosci*, 34(30), 9927-9944. <https://doi.org/10.1523/JNEUROSCI.4567-13.2014>  
471  
472  
473
- 474 Truccolo, W., Donoghue, J. A., Hochberg, L. R., Eskandar, E. N., Madsen, J. R., Anderson, W. S., Brown, E. N., Halgren, E., & Cash, S. S. (2011). Single-neuron dynamics in human focal epilepsy. *Nat Neurosci*, 14(5), 635-641. <https://doi.org/10.1038/nn.2782>  
475  
476
- 477 Tryba, A. K., Merricks, E. M., Lee, S., Pham, T., Cho, S., Nordli, D. R., Jr., Eissa, T. L., Goodman, R. R., McKhann, G. M., Jr., Emerson, R. G., Schevon, C. A., & van Drongelen, W. (2019). Role of paroxysmal depolarization in focal seizure activity. *J Neurophysiol*, 122(5), 1861-1873. <https://doi.org/10.1152/jn.00392.2019>  
478  
479  
480
- 481 Van Drongelen, W. (2018). *Signal processing for neuroscientists*. Academic press.
- 482 Zhang, Z. W., & Deschênes, M. (1997). Intracortical axonal projections of lamina VI cells of the primary somatosensory cortex in the rat: a single-cell labeling study. *J Neurosci*, 17(16), 6365-6379. <https://doi.org/10.1523/jneurosci.17-16-06365.1997>  
483  
484  
485  
486



487 **Figures and Legends**

488

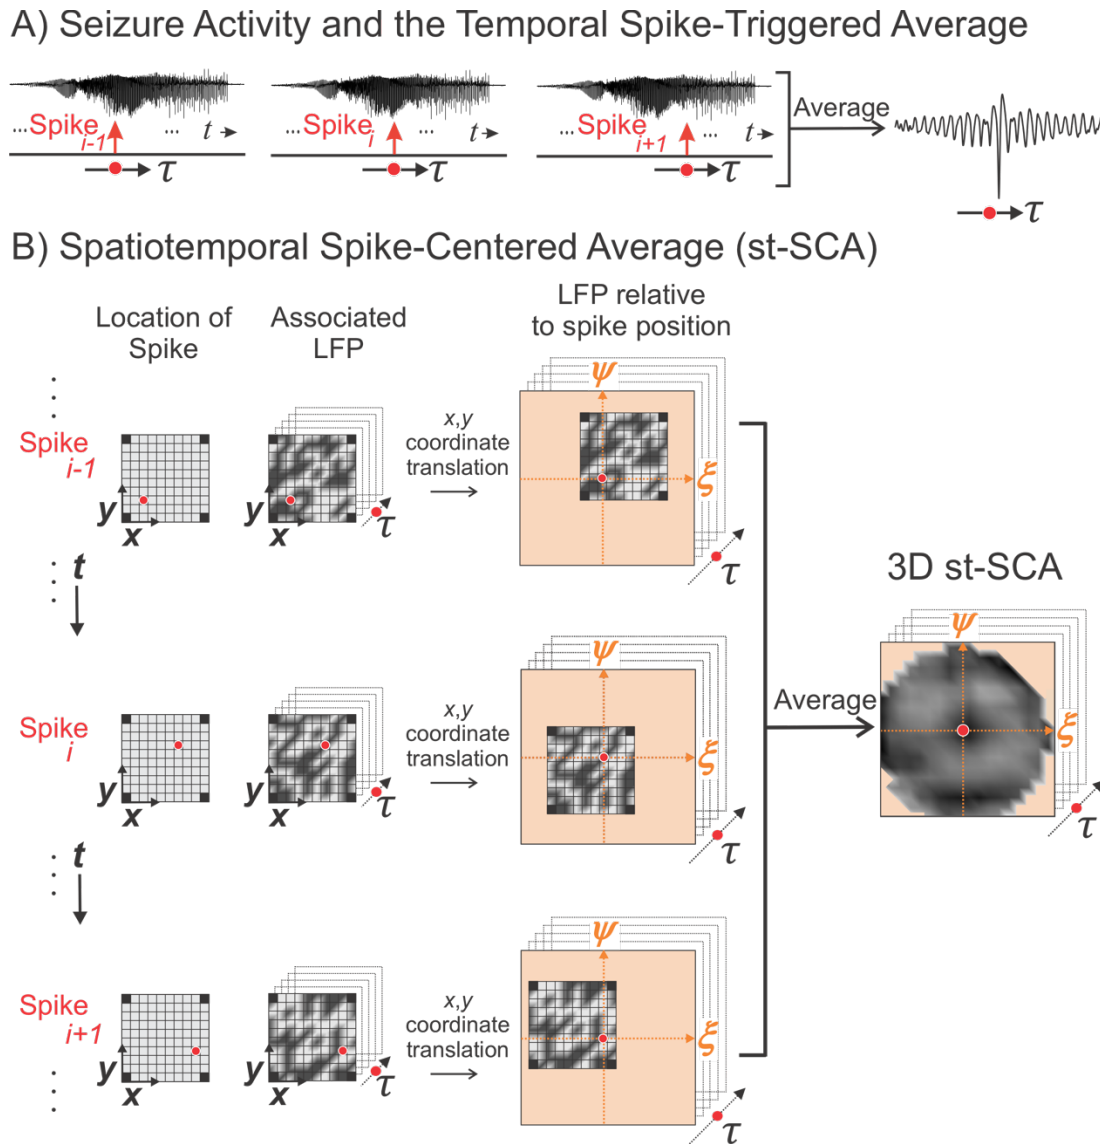

489

490

491 **Figure 1.** The method to compute the mesoscale spatiotemporal spike-centered average (st-SCA)  
 492 between spiking activity and the low frequency component of the local field potential (LFP) during a  
 493 human focal seizure involves centering and averaging each spike's associated LFP in both time and  
 494 space.

495 A) During seizure activity, the LFPs within the area of the electrode array (the summed LFP of the  
 496 microelectrode array is depicted in the upper trace) are associated with a multi-unit action potential train.  
 497 The LFP's relationship to the spike is considered over time  $\tau$  relative to the spike events.

498 B) For each spike (left column) across the MEA, its associated spatiotemporal LFP (middle column) is  
 499 determined. The red circle in the middle column indicates the spike position on the MEA. Next, the  
 500  $(x, y)$  axes of the LFP are translated into the  $(\xi, \psi)$  axes, such that the associated spike position is at the  
 501 origin (right column). Finally, the results in the right column are averaged to create a matrix that contains  
 502 the st-SCA. Note that the corners of the average are undefined because the MEA does not have  
 503 electrodes in the corner positions.

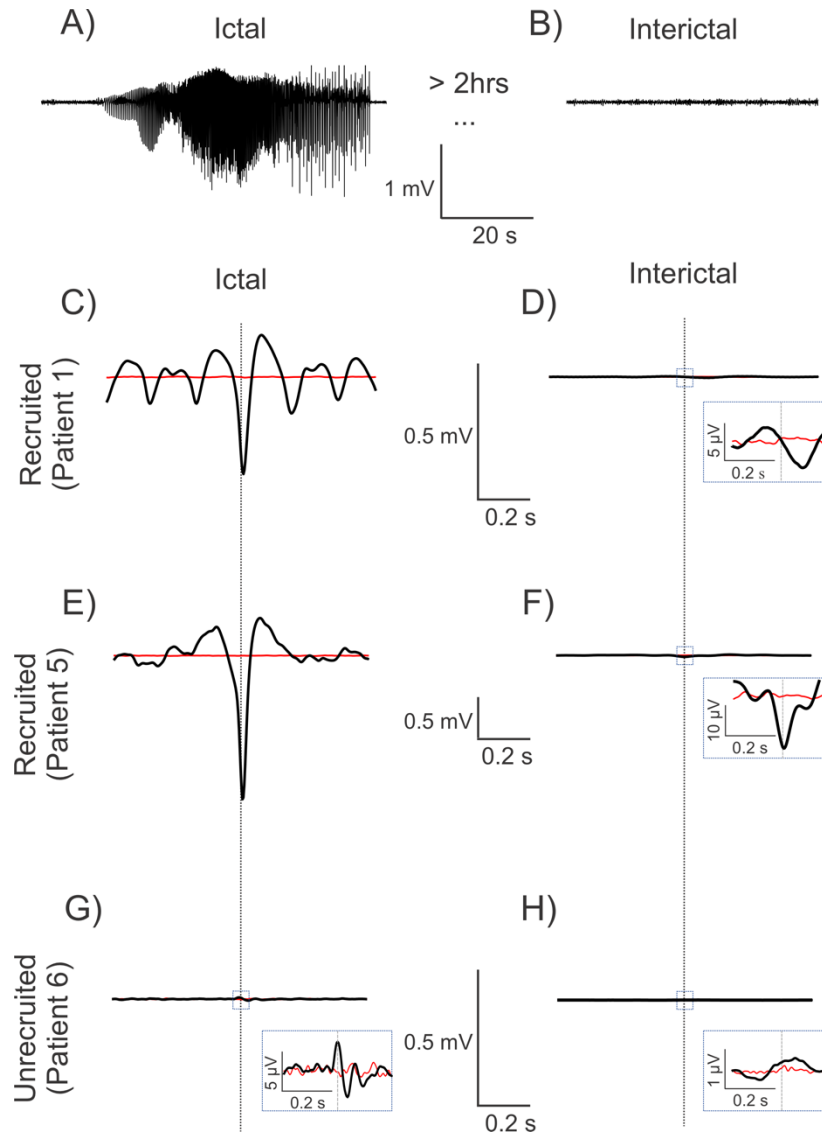

504  
505  
506  
507  
508  
509  
510  
511  
512  
513  
514  
515  
516  
517  
518

**Figure 2.** Spike-triggered averages (STAs) in recruited and unrecruited cortical territories during ictal and interictal phases show different patterns. The black traces are the signals, and the red traces represent the associated noise estimates. Vertical stippled lines represent the zero of the time-axis. A—B) Example signal trace of average ictal and interictal LFP activity across MEA channels. C—F) The STA in the recruited territories show an evolution towards a characteristic negative peak, with or without surrounding oscillations, during the ictal phase. The ictal phase amplitudes are also much higher than those of the interictal phase. G—H) The STA in the unrecruited territory show much smaller, non-zero ictal signals than the ones in the recruited territories. In contrast to the recruited territories, the small but dominant ictal peak polarity is positive in this case. The insets in panels D, F, G, H show that unrecruited ictal and across all interictal phases show smaller amplitude, albeit non-zero STAs.

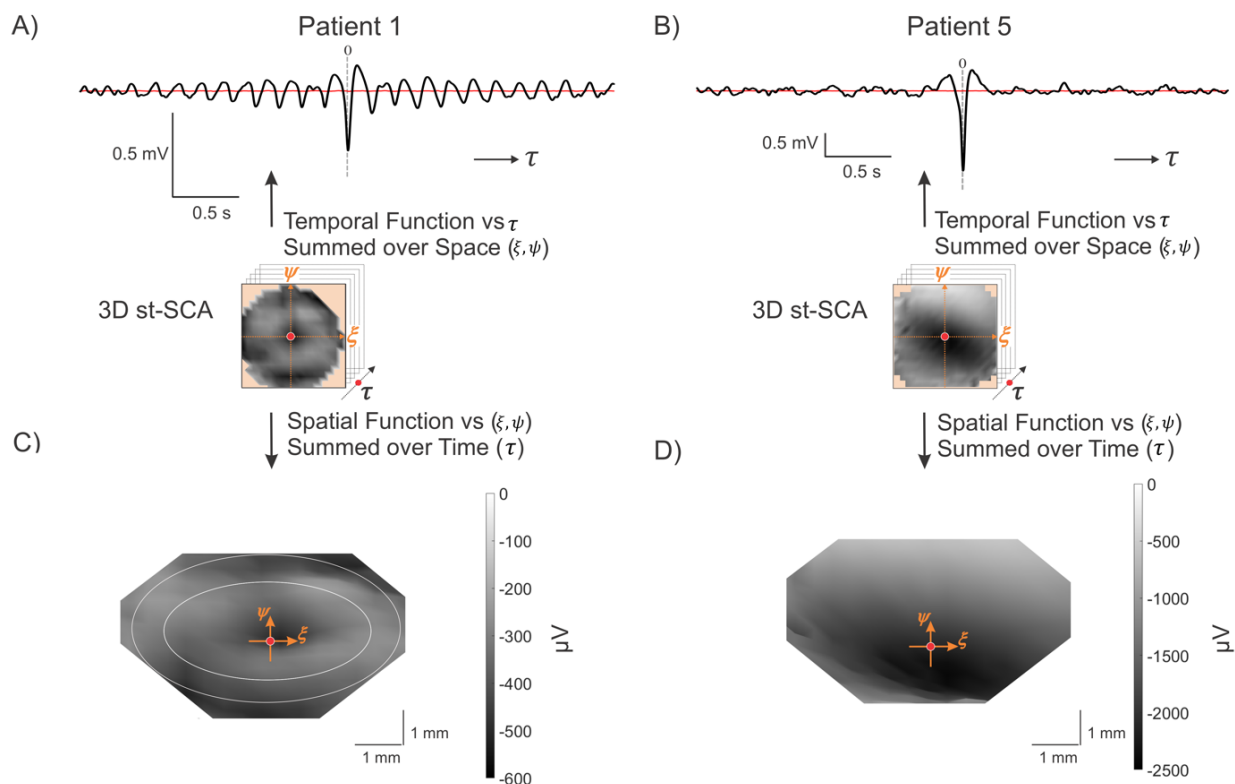

519  
520  
521 **Figure 3.** Properties of the ictal spatiotemporal spike-centered average (st-SCA) function during a focal  
522 seizure show different patterns for two representative patients.  
523 A—B) The temporal average is calculated by averaging the st-SCA over all spatial contributions  
524 ( $\pm 3.6$ mm).  
525 C—D) A 3D view (azimuth =  $0^\circ$ , elevation =  $70^\circ$ ) of the 3D st-SCA summed over time  $\tau = \pm 35$ ms. The  
526 center ( $\xi, \psi = 0, 0$ ) is indicated by the red dot. The two concentric circles are drawn to indicate that the  
527 center is surrounded by two rings. Note the apparent radial symmetry of the st-SCA pattern in (C).  
528 Grayscale is in  $\mu$ V units.

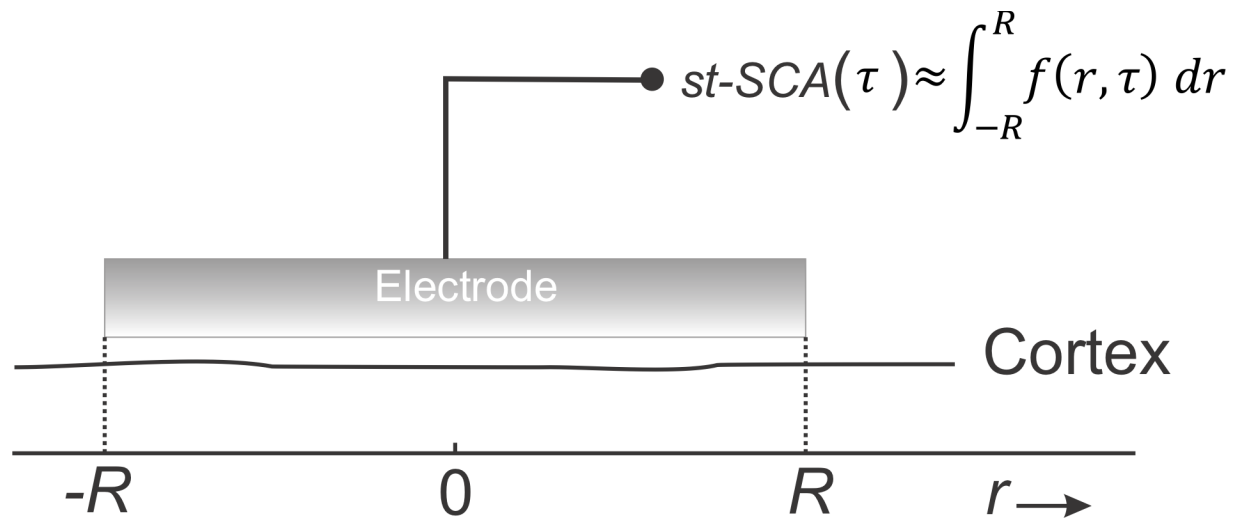

529  
530  
531  
532  
533  
534  
535  
536  
537  
538  
539

**Figure 4.** A mathematical model as represented by the recording of macroelectrode measures the underlying network's st-SCA. The electrode covers an area of one-dimensional cortex where we record the effect associated with a single centrally located ictal action potential,  $\delta(r, \tau) = \delta(0, 0)$ , i.e., the macroelectrode measures the underlying network's temporal component of the st-SCA,  $st-SCA_t(\tau)$ . This measurement can be approximated by an unknown action potential's spatiotemporal cortical activation function,  $f(r, \tau)$ , integrated over the spatial range  $[-R, R]$  covered by the electrode.

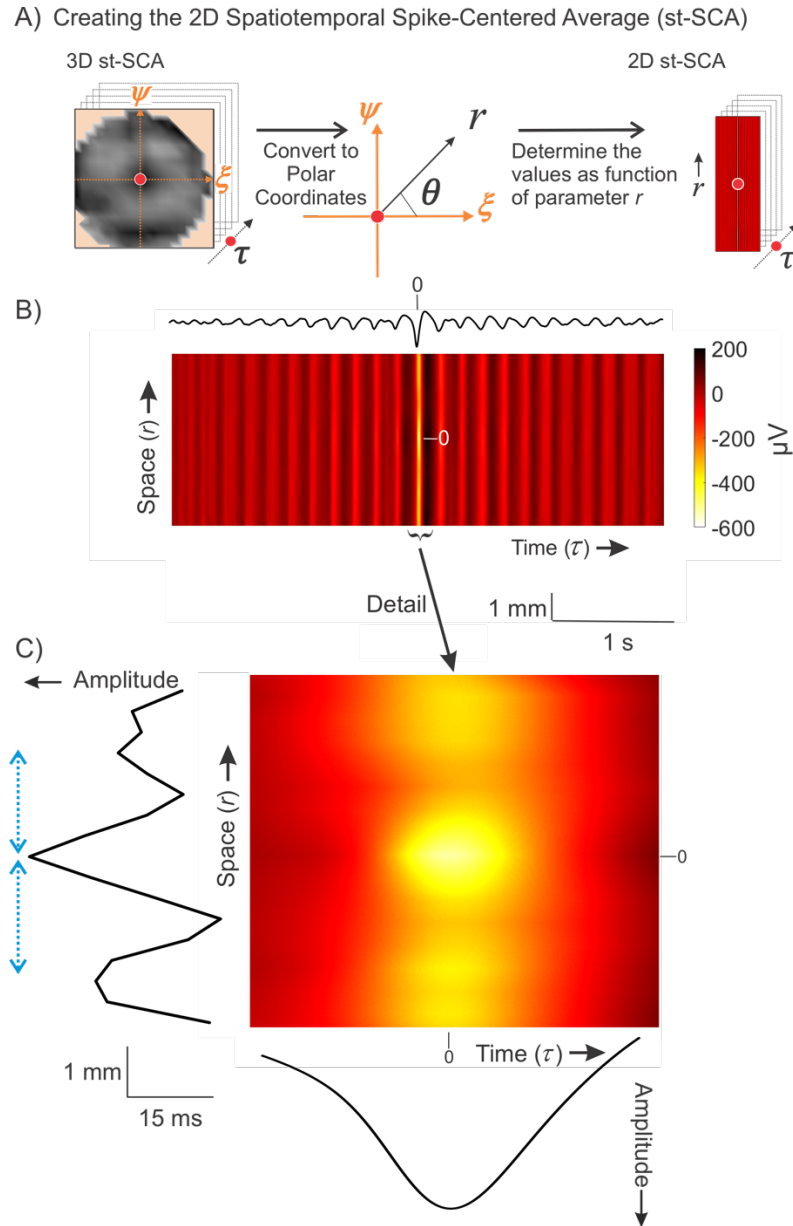

540  
 541  
 542 **Figure 5.** The method to compute the 2D spatiotemporal spike-centered average,  $st\text{-}SCA(r, \tau)$  allows for  
 543 a detailed visualization of spatial and temporal components for Patient 1  
 544 A) The Cartesian coordinates ( $\xi, \psi$ ) from the 3D st-SCA are converted into polar coordinates ( $r, \theta$ ),  
 545 resulting in a 2D st-SCA.  
 546 B) A color representation of  $st\text{-}SCA(r, \tau)$ . The top trace, the temporal component of the  $st\text{-}SCA_t(\tau)$ , is  
 547 obtained by the sum of  $st\text{-}SCA(r, \tau)$  over  $r$  (same as the signal in Fig. 3A). Amplitude and color scale are  
 548 in  $\mu\text{V}$ .  
 549 C) Detail of the central part of Panel B. The left margin shows the resulting wave from summation over  
 550 time, generating the spatial component of st-SCA. The green arrows on the left indicate the distance  
 551 ( $\sim 2.5\text{mm}$ ) between the peaks seen in this function. The bottom margin depicts the resulting wave from  
 552 summation over space, generating the temporal component of the st-SCA.

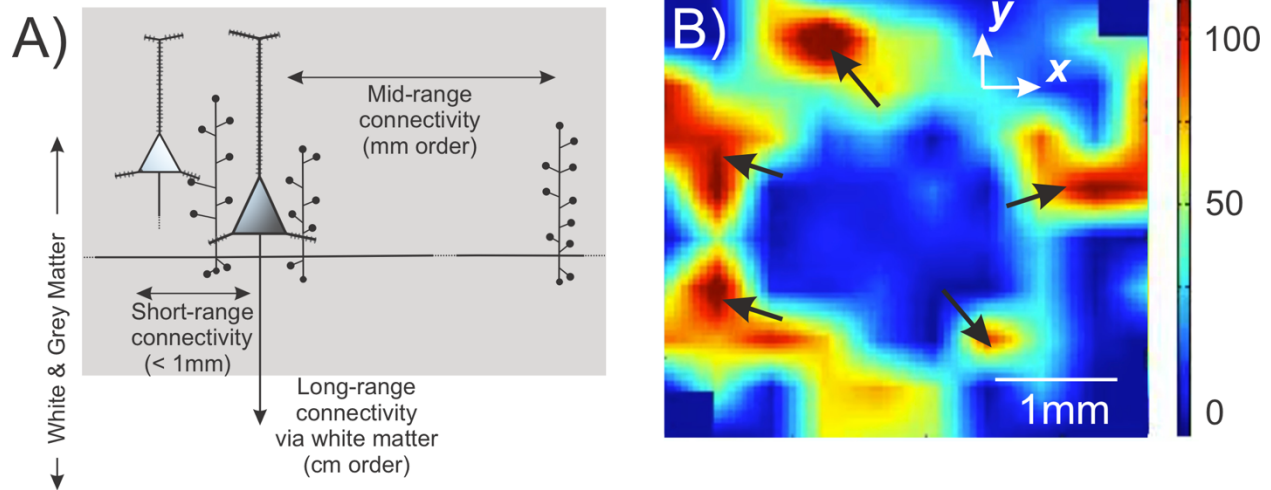

553  
554  
555  
556  
557  
558  
559  
560  
561  
562  
563  
564

**Figure 6.** The propagation of the ictal wavefront corroborates the involvement of mid-range excitatory neocortical connectivity by axon collaterals.

A) Diagram of gray matter excitatory connections of a neocortical pyramidal cell showing the short-range connections (order of 100s of  $\mu\text{m}$ ) and mid-range connections (order of mm) via the pyramidal cell axon collaterals (based on Fig. 5 in Nieuwenhuys, 1994).

B) Snapshot of Movie S1 depicting the propagation of ictal multi-unit action potentials across part of a Utah array. The black arrows show multiple contiguously active areas that are separated by a mid-range mm-sized distance, supporting that the excitatory axon collateral connections are invoked for propagation of the ictal activity. Color scale represents the number of spikes per second.
